# Supplementary material for: The anti-cancer activity of green tea, coffee and cocoa extracts on human cervical adenocarcinoma HeLa cells depends on both pro-oxidant and anti-proliferative activities of polyphenols
Source: Royal Society of Chemistry journal article supplement (doi:10.1039/c4ra13230k), 2014-12-02
Supplement: c4ra13230k1.pdf [file c4ra13230k1.pdf]

1 **Electronic Supplementary Information (ESI)**

2

3 **The anti-cancer activity of green tea, coffee and cocoa extracts in human cervical**  
4 **adenocarcinoma HeLa cells depends on both pro-oxidant and anti-proliferative activities of**  
5 **polyphenols**

6

7 Maja Krstic,\* Marija Stojadinovic,\* Katarina Smiljanic, Dragana Stanic-Vucinic and Tanja  
8 Cirkovic Velickovic

9

10 University of Belgrade - Faculty of Chemistry, Center of Excellence for Molecular Food  
11 Sciences, Department of Biochemistry

12 \*These authors equally contributed to the manuscript

13

14

15 **Corresponding author:**

16 Tanja Cirkovic Velickovic

17 University of Belgrade - Faculty of Chemistry

18 Center of Excellence for Molecular Food Sciences

19 Department of Biochemistry

20 Studentski trg 12-16, 11000 Belgrade, Serbia

21 [tcirkov@chem.bg.ac.rs](mailto:tcirkov@chem.bg.ac.rs)

22 Tel: +381113336608

23 Fax: +381112184330

## 24 **EXPERIMENTAL**

25

### 26 **MTT assay**

27 Cells were seeded in 96-well plates at density of 10,000 cells per well and left overnight to allow  
28 cell attachment. Hereafter, cells were incubated with each polyphenol extract (0-200  $\mu\text{g}$  GAE  
29  $\text{mL}^{-1}$  in 200  $\mu\text{L}$ ) for the next 24 and 72 h. Only medium was added to the cells in the control  
30 wells. Cell culture medium with or without polyphenol extracts was added to blank wells. After  
31 the indicated period of time, 20  $\mu\text{L}$  of MTT solution (5  $\text{mg}$   $\text{mL}^{-1}$  in phosphate-buffered saline,  
32 PBS) were added to each well and incubated for the next 4 h at 37°C. Medium was carefully  
33 removed and 200  $\mu\text{L}$  of DMSO were added to dissolve the formed formazan complexes;  
34 absorbance was read at 492 nm. In addition, prior to MTT addition, cells were visualized under  
35 the light inverted microscope to observe potential changes in cell morphology. Data are  
36 expressed as percentage of viability with untreated cells taken as 100%.

37

### 38 **DNA staining and cell cycle analysis**

39 HeLa cells were seeded at density of 50,000 cells per well in 24-well plates and left overnight  
40 prior to the addition of polyphenol extracts. Cells were incubated for 24 or 48 h with 100  $\mu\text{g}$   
41  $\text{GAE}$   $\text{mL}^{-1}$  of polyphenols in the final volume of 1  $\text{mL}$  per well. Upon incubation, cells were  
42 harvested (adherent and detached cells from each well were collected), washed 1x with PBS and  
43 fixed in ice-cold 70% ethanol overnight at 4°C. The next day, cells were washed 2x with PBS  
44 but centrifuged at 850 g to minimize cell loss. Fixed cells were treated with 200  $\mu\text{g}$   $\text{mL}^{-1}$  of  
45 RNase A for 30 min at 37°C (to degrade RNA that also stains with PI) and subsequently stained  
46 with 50  $\mu\text{g}$   $\text{mL}^{-1}$  of PI for the next 30 min at room temperature prior to flow cytometric analysis

47 on FACSCalibur (Becton Dickinson, Franklin Lakes, NY, USA). Data were further analyzed in  
48 ModFit LT deconvolution software (Verity, Topsham, ME, USA). Analysis included following  
49 steps: (1) cells were gated according to their size and granularity (FSC vs. SSC dot plot, G1), (2)  
50 singlet cell population was gated out from debris and aggregates (FL-2 width vs. FL-2 area dot  
51 plot, G2), (3) FL-2 area histogram was created and formatted to show only the cells inside the  
52 single cell region (G1 and G2). FL-2 area histograms were further modeled by fitting the best  
53 Gaussian distribution curve to each peak, G0-G1 and G2-M, and then calculating the resulting S-  
54 phase. For each measurement 2,000 events inside single cell region were collected.

55

#### 56 **CFSE staining and analysis of cell proliferation**

57 HeLa cells were harvested, washed 2x with PBS, and  $1.5 \times 10^7$  cells were resuspended in 250  $\mu$ L  
58 of medium without FCS. CFDA-SE stock solution (5 mmol L<sup>-1</sup> in DMSO) was diluted with  
59 medium without FCS to final concentration of 20  $\mu$ mol L<sup>-1</sup>. To enable uniform labeling, cells and  
60 CFDA-SE were separately incubated for 5 min at 37°C prior to mixing in 1:1 v/v ratio. Final cell  
61 concentration was  $3 \times 10^7$  cell mL<sup>-1</sup> and the one of CFDA-SE 10  $\mu$ mol L<sup>-1</sup>. Cells were labeled  
62 for 15 min at 37°C in the dark, washed 2x with complete medium (FCS will quench the excess of  
63 CFDA-SE) and seeded at density of 50,000 cells/well in 24-well plates. The next day,  
64 polyphenol extracts were added to corresponding wells to final concentration of 100  $\mu$ g GAE  
65 mL<sup>-1</sup>. After 72 h of incubation with polyphenols, both adherent and detached cells from each  
66 well were collected. To exclude dead from living cells, prior to FACS analysis, PI was added to  
67 final concentration of 50  $\mu$ g mL<sup>-1</sup>. For each measurement 20,000 events were collected.  
68 Distribution of cells in different generations and calculation of proliferating cell index (PCI)  
69 were performed in the Wizard module of ModFit LT software using standard proliferation

70 models to fit the raw data. The PCI is indicated as the sum of the cells in all generations divided  
71 by the computed number of original parent cells present at the start of the experiments, and it is  
72 therefore a measure of the increase in cell number in the culture over the course of the  
73 experiment.

74

75 **Relative gene expression of catalase and SOD as measured by real time quantitative**  
76 **reverse transcription PCR (real-time RT-qPCR)**

77 HeLa cells were treated with 100  $\mu\text{g GAE mL}^{-1}$  of GT, CF and CC for 12 and 24 h, with controls  
78 set at the same time. The total RNA was isolated with RNeasy Mini Kit with Qiazol reagent and  
79 gDNA eliminator solution following manufacturer's instruction (Qiagen Maryland, USA).  
80 Concentration and purity of the total RNA, enriched in mRNA, was determined with Nano Drop  
81 spectrophotometer 2000c (ThermoScientific, Wilmington, Delaware, USA). The qPCR primer  
82 sets of human CuZnSOD, MnSOD, catalase and glyceraldehyde 3-phosphate dehydrogenase (as  
83 endogenous control) were designed by Primer Express 2.0 software (Applied Biosystems,  
84 California, USA). The KAPA SYBRR FAST One-Step qRT-PCR Kit was used according to  
85 manufacturer's instructions (Kappa Biosystems, Maryland, USA) with 10 ng of total RNA as  
86 template. Relative expression levels were determined using Rotor-Gene Q real time PCR system  
87 (Qiagen, Germany) and GeneQuest software (version 2.0.2.4). The cycling parameters were  
88 42°C for 5 min, 95°C for 5 min followed by 40 cycles of three step cycling protocol (95°C for 3s,  
89 58°C for 20s and 72°C for 20s). The melting curve was analyzed at the end to ensure the product  
90 specificity (rising by one degree per 5s until 95°C).

91

92 **Determination of catalase and SOD activity**

93 Cell suspension at concentration of 600,000 cells per mL was incubated with 100  $\mu\text{g GAE mL}^{-1}$   
94 of GT, CF and CC for 24 h at 37°C. After incubation, cells were washed twice with ice-cold PBS  
95 and resuspended in 180  $\mu\text{L}$  of lysis buffer (1% Triton X-100, 1%  
96 phenylmethanesulfonylfluoride, 1% protease inhibitor cocktail, 50  $\text{mmol L}^{-1}$  Tris pH 7.5, 150  
97  $\text{mmol L}^{-1}$  NaCl, 0.25% Na-deoxycholate, 50  $\text{mmol L}^{-1}$  NaF, 10  $\text{mmol L}^{-1}$  pyrophosphate) and left  
98 in the ice-bath for the next 30 minutes until samples were resolved. Cell lysates were then  
99 centrifuged for 15 minutes at 13,400 rpm and the obtained supernatants were stored at -80°C  
100 until further analysis.

101

102 *Catalase activity assay.* Working substrate solution was prepared by diluting 30%  $\text{H}_2\text{O}_2$  with 50  
103  $\text{mmol L}^{-1}$  phosphate buffer pH 7.0 until reaching the absorbance at 240 nm between 0.525 and  
104 0.550. To a cuvette with 160  $\mu\text{L}$  of working substrate solution, 6  $\mu\text{L}$  of cell lysate were added,  
105 contents were mixed and cuvette was immediately placed in the spectrophotometer to monitor  
106 the changes in absorbance during 180s at room temperature. Catalase activity was calculated and  
107 expressed as the number of units per mg of total protein, where one unit of activity corresponds  
108 to an absorbance change of 0.01 per one s.

109

110 *SOD in-gel activity assay.* Resolution of proteins from cell lysates was carried out on 10% native  
111 polyacrylamide gel electrophoresis according to Laemmli.<sup>1</sup> Per each lane, 13  $\mu\text{g}$  of proteins were  
112 applied. When finished, the polyacrylamide gel was first immersed in 1.23  $\text{mmol L}^{-1}$  solution of  
113 NBT for 15 min, and then in the riboflavin solution (28  $\mu\text{mol L}^{-1}$  riboflavin and 28  $\text{mmol L}^{-1}$   
114 TEMED in 100  $\text{mmol L}^{-1}$  K-phosphate buffer pH 7.0) for the additional 15 minutes in the dark.  
115 Hereafter, the gel was exposed to a light source for 15 minutes to initiate the photochemical

116 reaction. NBT and SOD in the gel compete for the superoxide anion radical. In the NBT-  
117 negative staining, SOD protein bands became transparent, while the rest of the gel develops dark  
118 purple color due to reduced NBT. Gels were further analyzed in Gel-Pro Analyzer 3.0 program  
119 (Media cybernetics, Bethesda, USA) and integrated optical density of each band was calculated.

120

## 121 **REFERENCES**

122

123 1. U.K. Laemmli, *Nature*. 1970, **227**, 680-685.
